# Supplementary material for: Aluminium(iii) dialkyl 2,6-bisimino-4R-dihydropyridinates(−1): selective synthesis, structure and controlled dimerization
Source: Royal Society of Chemistry journal article supplement (doi:10.1039/c9dt00847k), 2019-01-01
Supplement: c9dt00847k1.pdf [file c9dt00847k1.pdf]

**Supporting Information for the manuscript entitled**

**Aluminium (III) Dialkyl 2,6-bisimino-4R-dihydropyridinates(-1): Selective Synthesis, Structure and Controlled Dimerization.**

Manuel Gallardo-Villagrán,<sup>a</sup> Fernando Vidal,<sup>b</sup> Eleuterio Álvarez,<sup>a</sup> Pilar Palma, Eugene Y.-X. Chen,<sup>b</sup> Juan Cámpora,<sup>a</sup> and Antonio Rodríguez-Delgado\*<sup>a</sup>

<sup>a</sup> Instituto de Investigaciones Químicas, CSIC-Universidad de Sevilla. c/ Américo Vespucio, 49, 41092, Sevilla, Spain.

<sup>b</sup> Department of Chemistry, Colorado State University, Fort Collins, Colorado 80523-1972

NMR Spectra

S2-S5

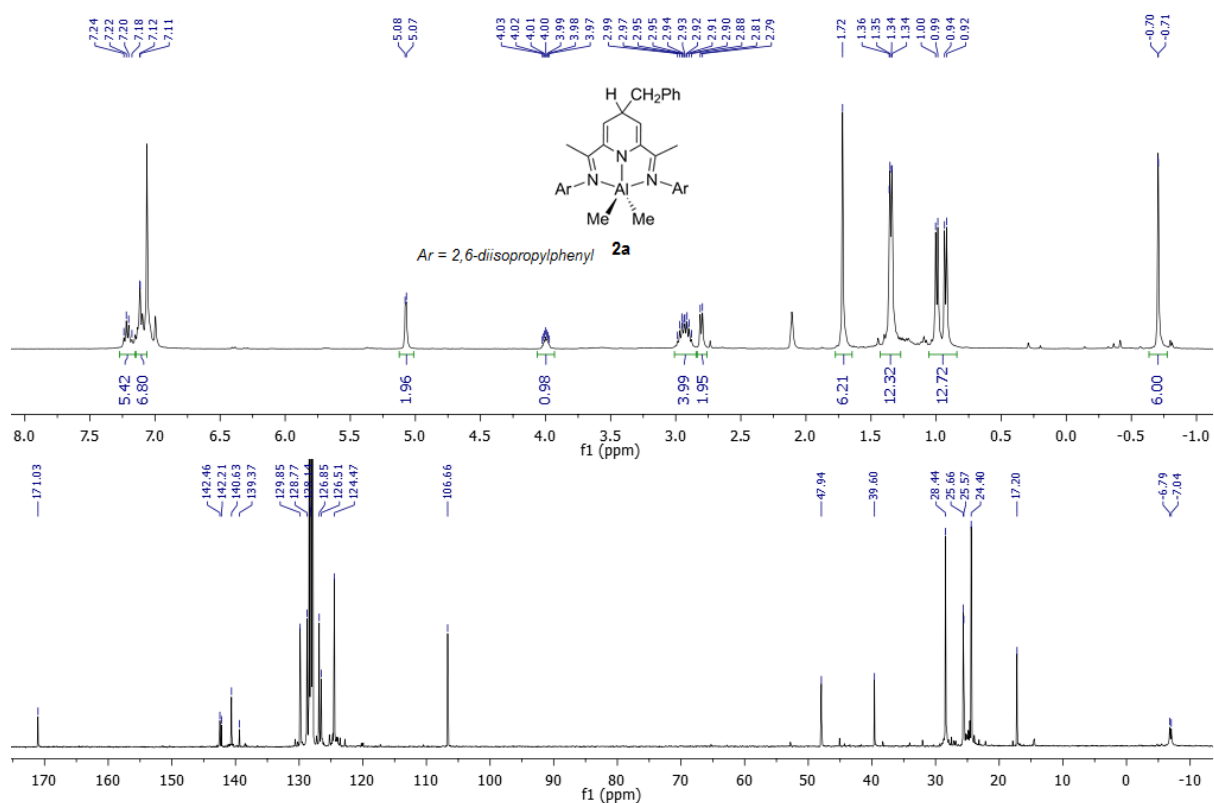

**Figure S1.** <sup>1</sup>H (C<sub>7</sub>D<sub>8</sub>, 25 °C, 400 MHz) and <sup>13</sup>C-NMR (C<sub>6</sub>D<sub>6</sub>, 25 °C, 100 MHz) spectra of compound **2a**

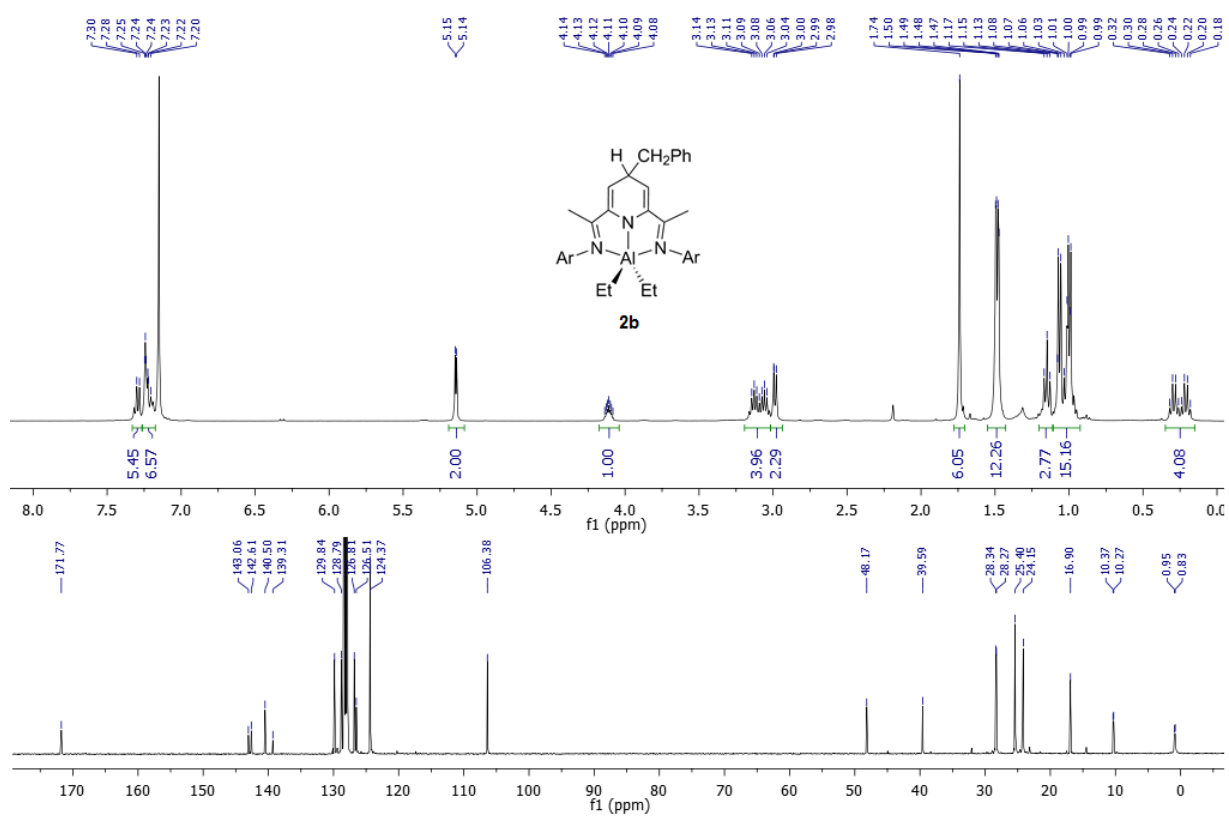

**Figure S2.** <sup>1</sup>H (C<sub>6</sub>D<sub>6</sub>, 25 °C, 400 MHz) and <sup>13</sup>C-NMR (C<sub>6</sub>D<sub>6</sub>, 25 °C, 100 MHz) spectra of compound **2b**

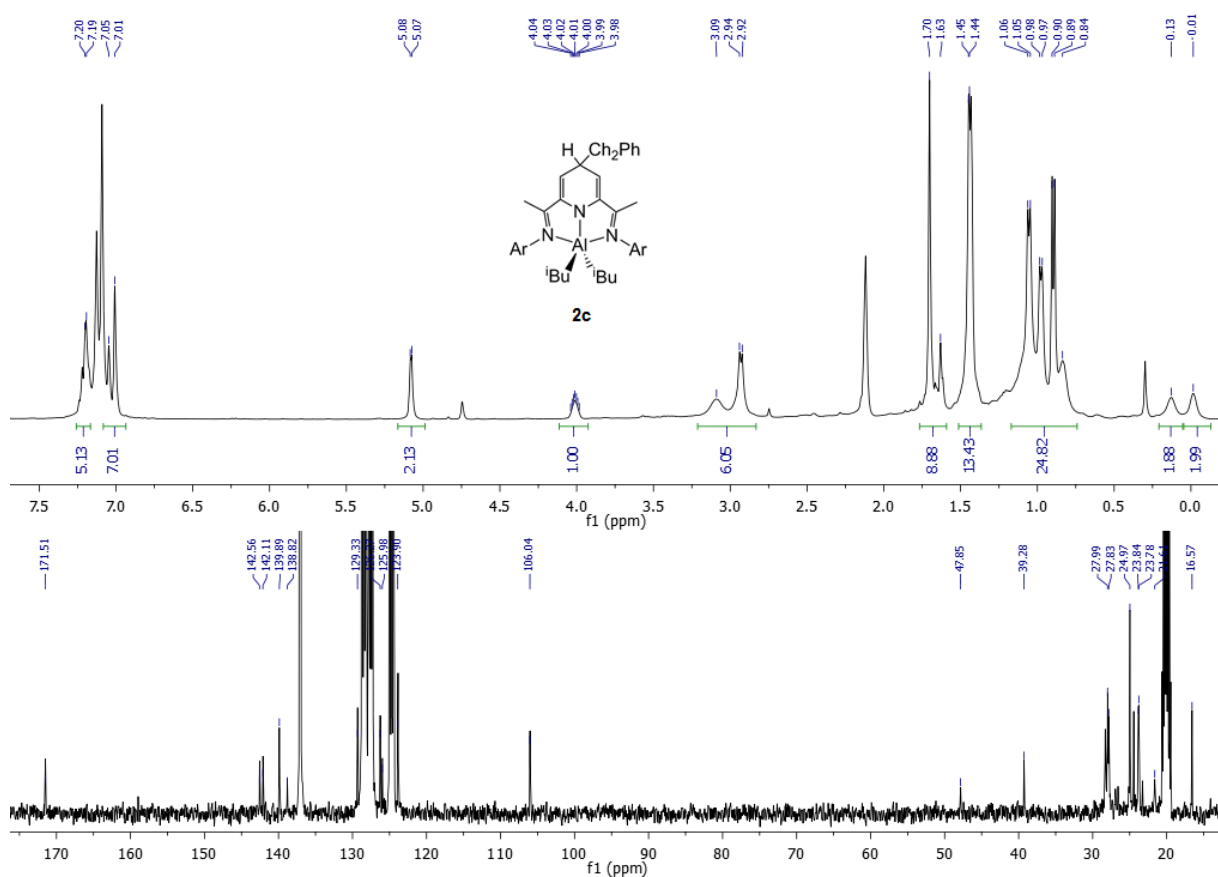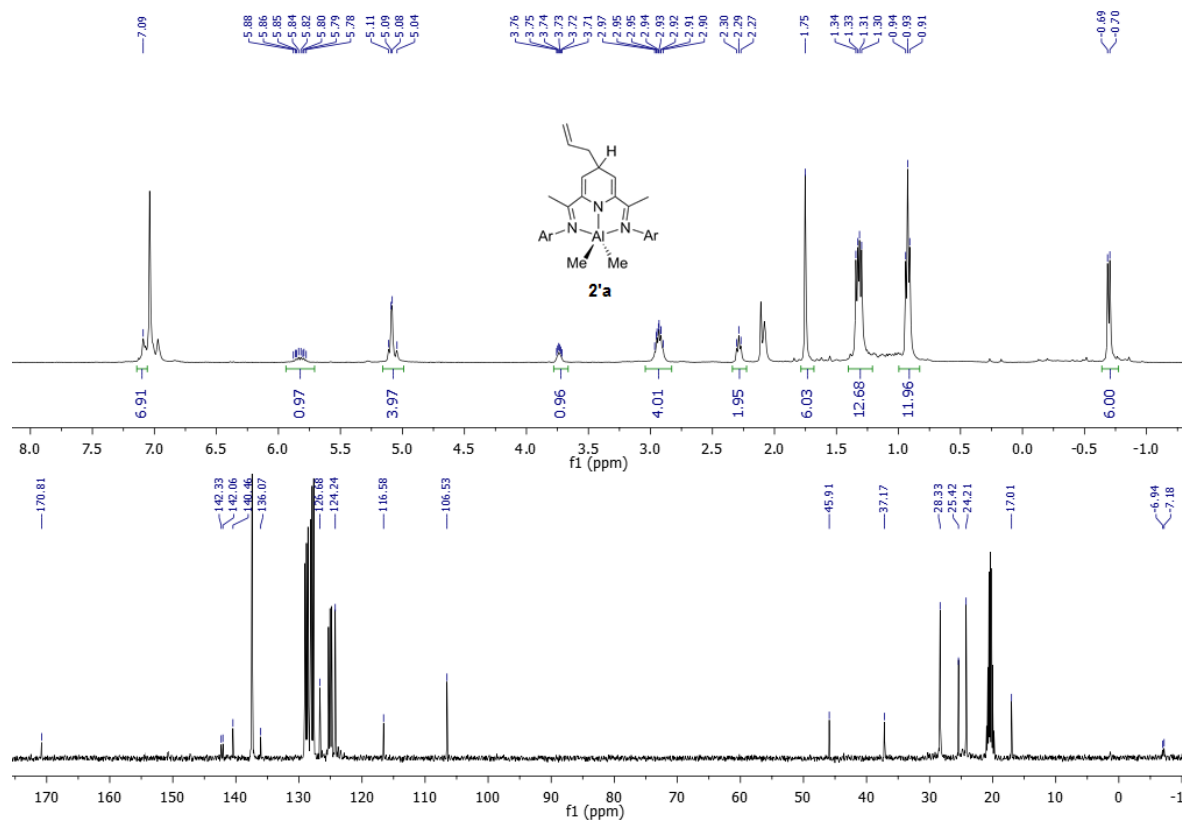

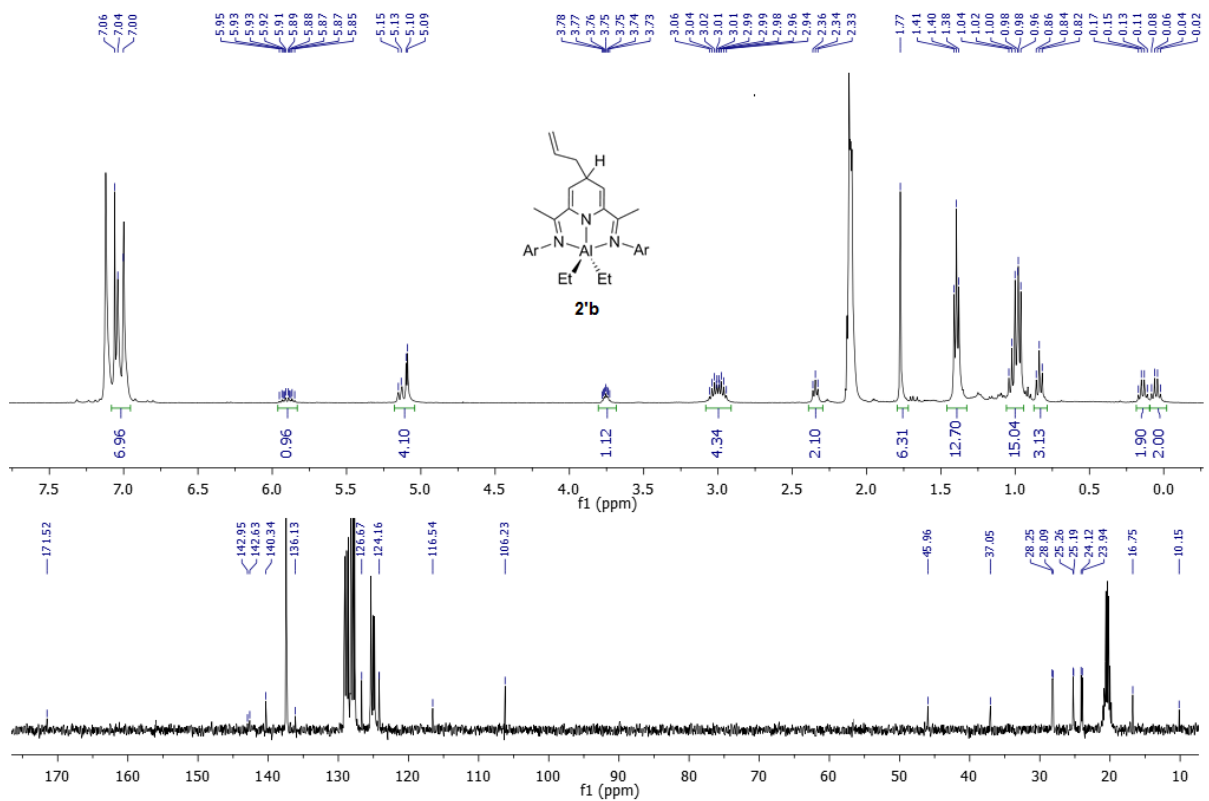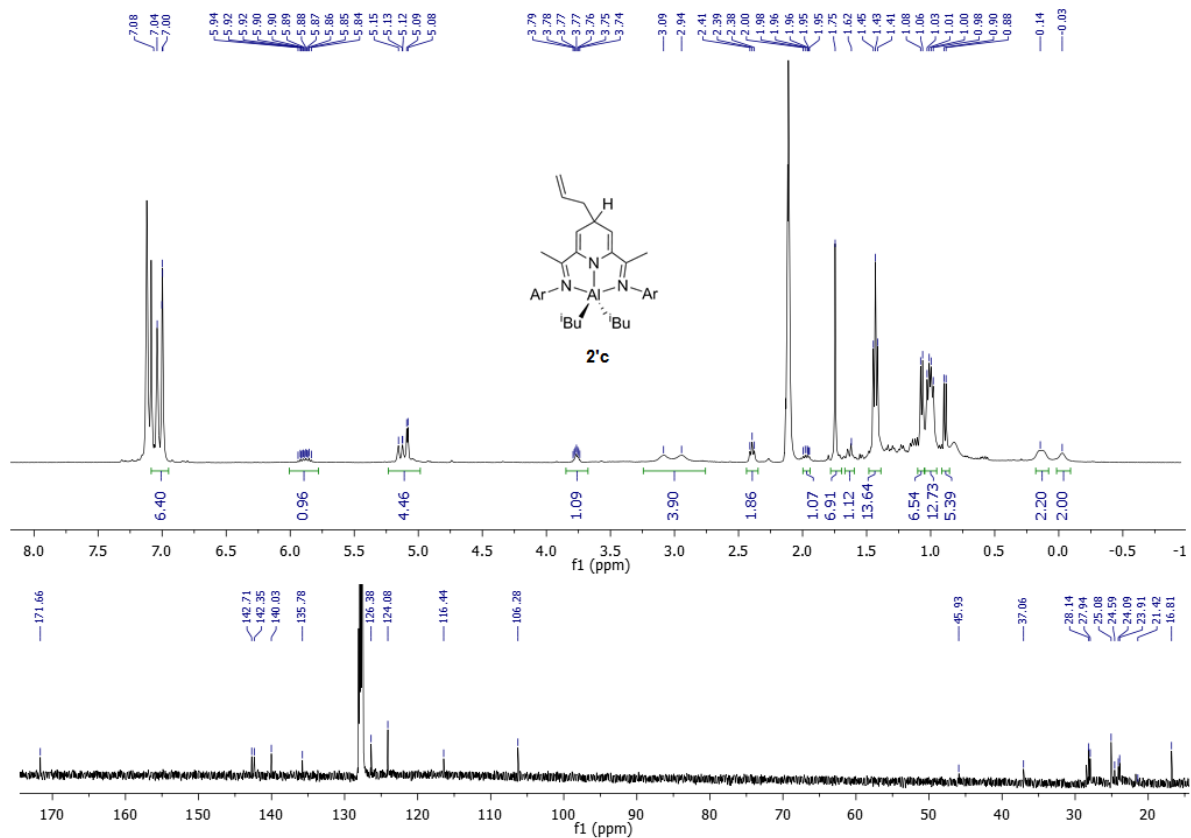

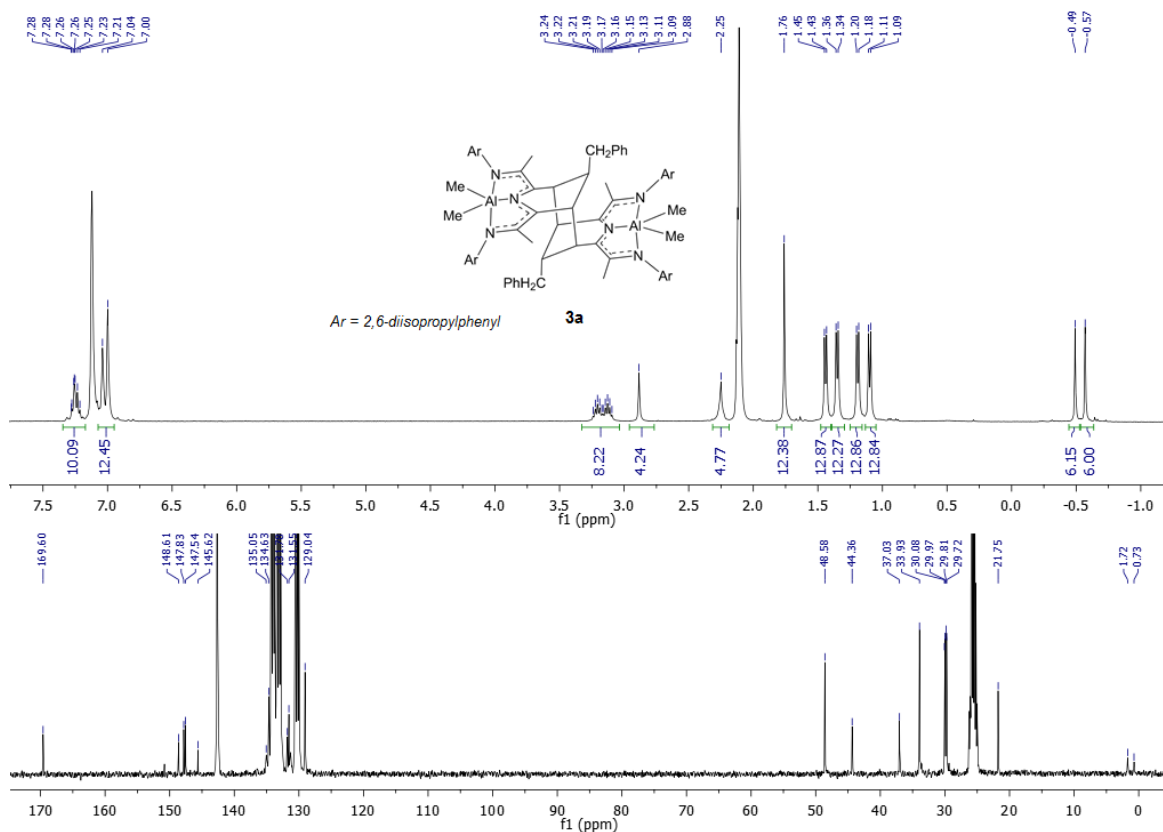

Figure S7.  $^1\text{H}$  ( $\text{C}_7\text{D}_8$ , 25 °C, 400 MHz) and  $^{13}\text{C}$ -NMR ( $\text{C}_7\text{D}_8$ , 25 °C, 100 MHz) spectra of compound **3a**

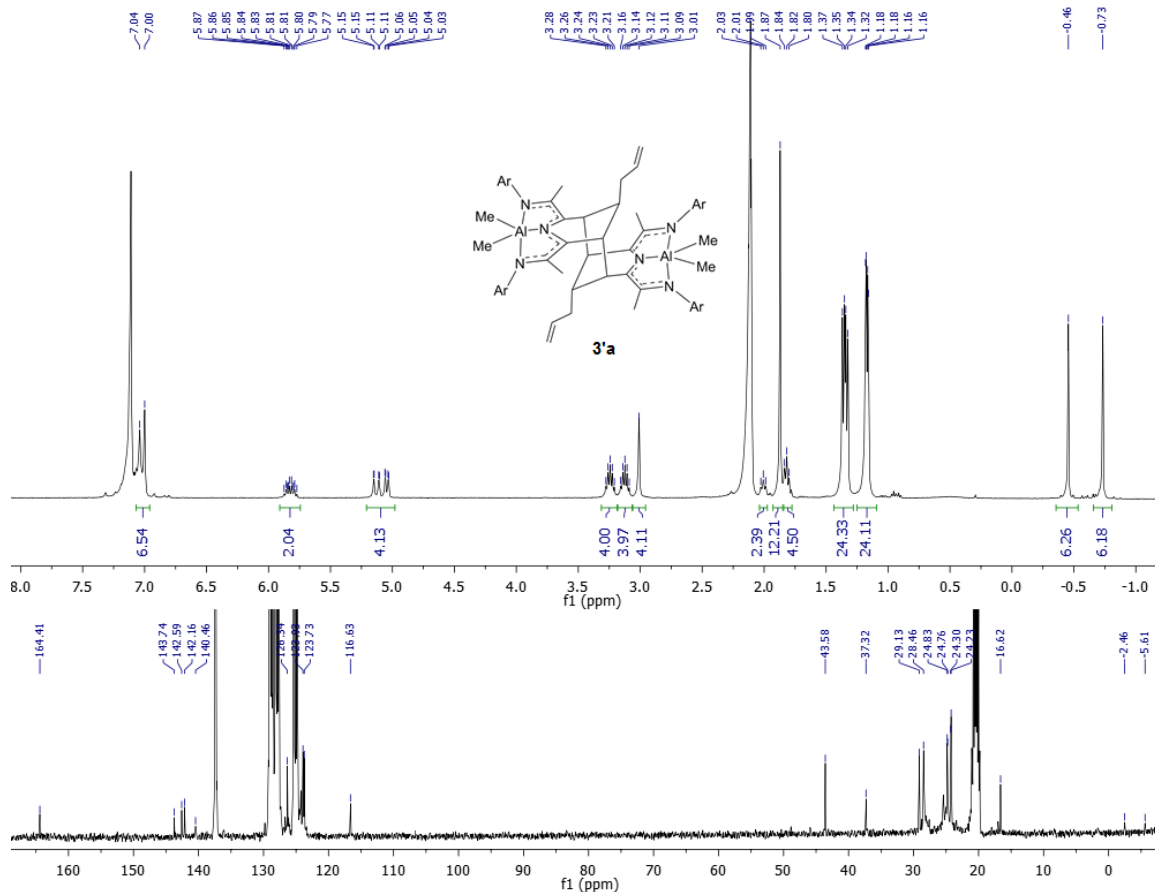

Figure S8.  $^1\text{H}$  ( $\text{C}_7\text{D}_8$ , 25 °C, 400 MHz) and  $^{13}\text{C}$ -NMR ( $\text{C}_7\text{D}_8$ , 25 °C, 100 MHz) spectra of compound **3'a**
